# Supplementary material
Source: PubMed Central journal article supplement (PMC3874460)
Supplement: NIHMS520406-supplement-supplement_1.pdf [file NIHMS520406-supplement-supplement_1.pdf]

**Appendix Table 1. Health and SES variations across geography**

*Across County (150 county units)*

|                       | Urban  |        |                  |                      | Rural  |        |                  |                      |
|-----------------------|--------|--------|------------------|----------------------|--------|--------|------------------|----------------------|
|                       | Mean   | Median | Top 5 percentile | Bottom 5 percentiles | Mean   | Median | Top 5 percentile | Bottom 5 percentiles |
| SRH poor or very poor | 0.21   | 0.19   | 0.09             | 0.36                 | 0.32   | 0.30   | 0.14             | 0.50                 |
| Any ADL difficulty    | 0.06   | 0.05   | 0.00             | 0.16                 | 0.09   | 0.08   | 0.01             | 0.18                 |
| Any IADL difficulty   | 0.16   | 0.14   | 0.05             | 0.34                 | 0.25   | 0.23   | 0.07             | 0.46                 |
| CES-D [0-13]          | 6.96   | 6.76   | 4.50             | 10.29                | 9.24   | 9.25   | 5.07             | 12.59                |
| Hypertension          | 0.45   | 0.46   | 0.29             | 0.61                 | 0.38   | 0.38   | 0.21             | 0.55                 |
| Weight(kg)            | 62.44  | 62.68  | 55.23            | 71.40                | 57.19  | 57.57  | 49.64            | 64.29                |
| Height(cm)            | 159.42 | 159.78 | 163.52           | 154.92               | 157.68 | 157.96 | 161.58           | 152.30               |
| Years of Schooling    | 6.93   | 6.82   | 9.81             | 4.00                 | 4.09   | 4.08   | 6.40             | 2.25                 |
| Household PCE (000s)  | 15.85  | 10.82  | 39.33            | 5.96                 | 6.23   | 5.75   | 10.49            | 3.50                 |

*Across Community (450 community units)*

|                       | Urban  |        |                  |                      | Rural  |        |                  |                      |
|-----------------------|--------|--------|------------------|----------------------|--------|--------|------------------|----------------------|
|                       | Mean   | Median | Top 5 percentile | Bottom 5 percentiles | Mean   | Median | Top 5 percentile | Bottom 5 percentiles |
| SRH poor or very poor | 0.21   | 0.22   | 0.07             | 0.38                 | 0.30   | 0.28   | 0.11             | 0.51                 |
| Any ADL difficulty    | 0.07   | 0.05   | 0.00             | 0.20                 | 0.10   | 0.07   | 0.00             | 0.29                 |
| Any IADL difficulty   | 0.16   | 0.15   | 0.03             | 0.38                 | 0.25   | 0.23   | 0.06             | 0.50                 |
| CES-D [0-13]          | 7.27   | 7.27   | 3.89             | 10.17                | 8.80   | 8.85   | 4.78             | 12.26                |
| Hypertension          | 0.46   | 0.48   | 0.25             | 0.67                 | 0.38   | 0.36   | 0.19             | 0.59                 |
| Weight(kg)            | 61.78  | 62.30  | 54.02            | 70.16                | 58.10  | 56.99  | 50.57            | 66.06                |
| Height(cm)            | 159.42 | 159.27 | 165.16           | 154.68               | 157.49 | 157.70 | 161.45           | 152.73               |
| Years of Schooling    | 6.93   | 6.83   | 10.12            | 3.60                 | 4.18   | 4.03   | 6.98             | 2.00                 |
| Household PCE (000s)  | 14.23  | 11.35  | 31.58            | 5.41                 | 6.08   | 5.55   | 10.65            | 3.50                 |

*Data Source: CHARLS 2011-2012 Baseline*

**Appendix Table 2: Descriptives of control variables**

---

|                          | Total | Urban | Rural |
|--------------------------|-------|-------|-------|
| Age                      | 59.51 | 59.44 | 59.55 |
| Fraction Male            | 0.49  | 0.47  | 0.49  |
| Fraction Married         | 0.87  | 0.87  | 0.87  |
| Fraction Urban Residents | 0.40  |       |       |
| Education                |       |       |       |
| Illiterate               | 0.27  | 0.17  | 0.34  |
| Primary education        | 0.39  | 0.35  | 0.42  |
| Middle school and above  | 0.34  | 0.47  | 0.24  |
| Ln Household PCE         | 3.77  | 3.95  | 3.65  |
| Ln Community PCE         | 3.88  | 4.05  | 3.76  |
| Smoking                  |       |       |       |
| Ever smoke               | 0.40  | 0.38  | 0.42  |
| Currently smoking        | 0.28  | 0.26  | 0.30  |
| Drinking                 |       |       |       |
| Ever drink               | 0.32  | 0.31  | 0.32  |
| Currently drinking       | 0.25  | 0.24  | 0.26  |
| Observations             | 17278 | 6982  | 10296 |

---

*Data Source: CHARLS 2011-2012 Baseline*

**Appendix Table 3. Oaxaca decomposition of community characteristics on health and SES outcomes**

|                         | SRH<br>poor/very | Any ADL<br>difficulty | Any IADL<br>difficulty | CES-D    | Measured/Diagnosed<br>Hypertension | Low<br>Weight | Over<br>Weight | Height     | Years of<br>schooling | LnPCE     |
|-------------------------|------------------|-----------------------|------------------------|----------|------------------------------------|---------------|----------------|------------|-----------------------|-----------|
| Rural                   | 0.321***         | 0.090***              | 0.250***               | 9.241*** | 0.388***                           | 0.085***      | 0.265***       | 157.580*** | 4.208***              | 3.652***  |
| Urban                   | 0.223***         | 0.071***              | 0.169***               | 7.250*** | 0.455***                           | 0.045***      | 0.382***       | 158.957*** | 6.631***              | 3.950***  |
| Difference              | 0.099***         | 0.019***              | 0.081***               | 1.991*** | -0.067***                          | 0.040***      | -0.117***      | -1.377***  | -2.423***             | -0.298*** |
| Endowments              | 0.092***         | 0.039***              | 0.129***               | 2.145*** | -0.041***                          | 0.022***      | -0.058***      | -2.236***  | -1.978***             | -0.230*** |
| Coefficients            | -0.001           | -0.027***             | -0.024**               | -0.208   | -0.065***                          | 0.007         | -0.081***      | -0.380**   | -2.202***             | -0.166*** |
| Interaction             | 0.008            | 0.007                 | -0.024*                | 0.054    | 0.040**                            | 0.011         | 0.022          | 1.239***   | 1.758***              | 0.097***  |
| Endowments              |                  |                       |                        |          |                                    |               |                |            |                       |           |
| Human-made Environments | 0.065***         | 0.016**               | 0.085***               | 1.300*** | -0.012                             | 0.013*        | -0.029*        | -1.594***  | -1.921***             | -0.227*** |
| Climate                 | -0.006***        | -0.001                | -0.004***              | -0.040*  | -0.002                             | -0.001        | 0.002          | -0.096***  | -0.150***             | -0.011*** |
| Topology                | 0.009**          | 0.002                 | 0.004                  | 0.149*** | -0.005                             | -0.001        | -0.013***      | -0.041     | 0.114***              | 0.010***  |
| Demographics            | -0.000           | -0.001                | -0.001                 | -0.022   | 0.003                              | 0.000         | -0.001         | 0.228**    | 0.010                 | -0.001    |
| Education               | 0.012***         | 0.004**               | 0.021***               | 0.327*** | -0.006                             | -0.001        | 0.003          | -0.287***  |                       |           |
| Household Expenditure   | 0.015**          | 0.018***              | 0.024***               | 0.430*** | -0.018**                           | 0.012***      | -0.014         | -0.453***  |                       |           |
| Health Behavior         | -0.003**         | 0.000                 | -0.001                 | 0.001    | -0.001                             | 0.001**       | -0.006***      | 0.006      | -0.031***             | -0.001    |
| Coefficients            |                  |                       |                        |          |                                    |               |                |            |                       |           |
| Human-made Environments | -0.002           | 0.004                 | 0.001                  | -0.043   | -0.005                             | 0.007         | 0.013          | 0.283      | 1.248***              | 0.075***  |
| Climate                 | -0.005           | -0.022***             | -0.027**               | 0.613*** | 0.014                              | -0.005        | -0.047***      | -0.320     | -0.421***             | -0.019*   |
| Topology                | 0.022***         | -0.009**              | -0.000                 | 0.187*   | -0.018**                           | 0.013***      | -0.009         | -0.448***  | -0.226***             | 0.008     |
| Demographics            | 0.020            | -0.001                | -0.027                 | -0.352   | -0.088***                          | 0.051***      | -0.039         | -0.412     | 0.085                 | -0.115*** |
| Education               | -0.002           | 0.002                 | 0.013                  | 0.319    | 0.002                              | -0.002        | 0.023          | -0.138     |                       |           |
| Household Expenditure   | -0.052           | 0.047                 | -0.039                 | -1.601   | -0.546***                          | 0.151         | -0.248         | -4.507*    |                       |           |

|                         |          |         |          |        |          |          |          |           |           |           |
|-------------------------|----------|---------|----------|--------|----------|----------|----------|-----------|-----------|-----------|
| Health Behavior         | -0.004   | 0.003   | 0.015**  | 0.121  | -0.007   | 0.003    | 0.007    | -0.009    | 0.098     | 0.007     |
| Interaction             |          |         |          |        |          |          |          |           |           |           |
| Human-made Environments | -0.016   | 0.013   | -0.027** | -0.168 | 0.016    | 0.007    | 0.028    | 1.084***  | 1.734***  | 0.083***  |
| Climate                 | 0.007*** | 0.003** | 0.007*** | 0.050  | -0.003   | 0.003**  | -0.004   | -0.009    | 0.134***  | 0.011***  |
| Topology                | 0.011**  | -0.004  | -0.004   | 0.113  | -0.005   | 0.007*** | -0.006   | -0.197*** | -0.145*** | 0.001     |
| Demographics            | -0.000   | -0.000  | -0.001*  | -0.012 | -0.001   | -0.000   | -0.002** | -0.005    | 0.015**   | -0.001    |
| Education               | 0.002    | -0.000  | -0.002   | -0.068 | -0.004   | 0.002    | -0.011** | 0.068     |           |           |
| Household Expenditure   | 0.004    | -0.004  | 0.003    | 0.122  | 0.038*** | -0.010   | 0.016    | 0.299*    |           |           |
| Health Behavior         | 0.000    | -0.001  | 0.001    | 0.017  | -0.000   | 0.001    | 0.002    | -0.003    | 0.020**   | 0.003***  |
| Constant                | 0.022    | -0.051  | 0.039    | 0.548  | 0.582*** | -0.211** | 0.219    | 5.172**   | -2.986*** | -0.123*** |
| Observation             | 16,878   | 16,878  | 16,878   | 14,681 | 16,851   | 13,265   | 13,265   | 13,337    | 16,675    | 16,878    |

*Data Source: CHARLS 2011-2012 Baseline*
